# Supplementary material for: A convenient, economical and scalable multi-gram synthesis of 1-vinylcyclopropyl 4-methylbenzenesulfonate
Source: Royal Society of Chemistry journal article supplement (doi:10.1039/c4qo00089g), 2014-01-01

# A convenient, economical and scalable multi-gram synthesis of 1-vinylcyclopropyl 4-methylbenzenesulfonate

O. Stephen Ojo,<sup>a</sup> Phillip A. Inglesby,<sup>a</sup> Daniela E. Negru<sup>b</sup> and P. Andrew Evans<sup>\*b</sup>

<sup>a</sup> Department of Chemistry, University of Liverpool, Crown Street, L69 7ZD, United Kingdom

<sup>b</sup> Department of Chemistry, Queen's University, 90 Bader Lane, Kingston, ON K7L 3N6, Canada

## Contents of Supporting Information:

|    |                                                        |    |
|----|--------------------------------------------------------|----|
| 1. | General Information                                    | S1 |
| 2. | Spectral Data for <b>11</b> , <b>12</b> and <b>1</b> . | S2 |
| 3. | Procedure for the Synthesis of ACP <b>2a</b>           | S3 |
| 4. | Spectral Data for ACP <b>2a</b>                        | S3 |
| 5. | Copies of NMR Spectra                                  | S4 |

### 1. General Information

All reactions were carried out in flame-dried glassware under an atmosphere of argon using anhydrous solvent. Commercially available reagents were used as received from the following suppliers: ethyl 3-chloropropanoate (98%) and anhydrous potassium *tert*-butoxide (97%) were purchased from Alfa Aesar; titanium isopropoxide (98%), ammonium chloride (99.5%), sodium chloride (extra pure) were purchased from Acros Organics; ethylmagnesium bromide (3M in diethylether) and 4-(dimethylamino)pyridine (99%) were purchased from Sigma Aldrich; *p*-toluenesulfonyl chloride (98%) was purchased from Merck; magnesium sulphate (laboratory grade), triethylamine (laboratory grade), sodium hydrogen carbonate (analytical grade), 37% hydrochloric acid (analytical grade), petroleum ether (30-40 °C, laboratory grade), diethyl ether (laboratory grade, 99%, stabilized with BHT) and dichloromethane (HPLC grade) were purchased from Fisher Scientific. Anhydrous solvents were dried were obtained from a Grubbs solvent systems by passing the aforementioned solvents through activated alumina. Flash chromatography was performed using silica gel 60 (40-63 μm, *FluoroChem*) and gave spectroscopic data consistent with being ≥95% the assigned structure. IR spectra were recorded on an *Agilent Cary 630 FTIR* spectrometer; wavenumbers ( $\nu$ ) are given in  $\text{cm}^{-1}$ ; and the abbreviations w (weak, <25%), m (medium, 25-50%), s (strong, 51-75%), vs (very strong, >75%) and br (broad) are used to describe the relative intensities of the IR absorbance bands. Mass spectra were obtained through the *Chemistry Department Mass Spectrometry Service* at the Queen's University. <sup>1</sup>H spectra were

recorded on a *Bruker Avance DRX-500* spectrometer using  $d^1$ -chloroform at ambient temperature; chemical shifts ( $\delta$ ) are given in ppm. NMR data were calibrated using the signal of residual undeuterated solvent as an internal reference ( $\text{CHCl}_3$ ,  $\delta_{\text{H}} = 7.26$  ppm,  $\delta_{\text{C}} = 77.16$  ppm).  $^1\text{H}$  NMR data are reported as follows: chemical shift (multiplicity, 1<sup>st</sup> order spin system if available, coupling constant and integration). Coupling constants ( $J$ ) are reported in Hz and apparent splitting patterns are designated using the following abbreviations: s (singlet), d (doublet), t (triplet), q (quartet), quintet, sextet, m (multiplet), br (broad), app. (apparent) and combinations thereof.  $^{13}\text{C}$  NMR spectra with complete proton decoupling were described with the aid of an APT sequence, separating methylene and quaternary carbons (e, even), from methyl and methine carbons (o, odd).

## 2. Spectral Data for 11, 12 and 1

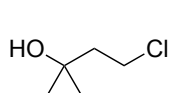

### 1-(2-Chloroethyl)cyclopropanol 11.<sup>1</sup>

$^1\text{H}$  NMR (500 MHz,  $\text{CDCl}_3$ )  $\delta$  3.74 (t,  $J = 7.1$  Hz, 2H), 2.71 (br. s, 1H), 1.99 (t,  $J = 7.1$  Hz, 2H), 0.77 (app. t,  $J = 6.0$  Hz, 2H), 0.52 (d, A of AB,  $J_{\text{AB}} = 5.3$  Hz, 1H), 0.51 (d, B of AB,  $J_{\text{AB}} = 5.6$  Hz, 1H).

$^{13}\text{C}$  NMR (125 MHz,  $\text{CDCl}_3$ )  $\delta$  54.08 (e), 42.11 (e), 41.10 (e), 13.41 (e).

IR (Neat) 3324 (br, m), 3089 (w), 3008 (w), 2965 (w), 1452 (m), 1419 (m), 1247 (vs), 1138 (m), 1013 (vs), 956 (s), 743 (s), 696 (vs)  $\text{cm}^{-1}$ .

HRMS (EI) calculated for  $\text{C}_5\text{H}_9^{35}\text{ClO}$  120.0342, found 120.0338.

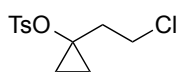

### 1-(2-Chloroethyl)cyclopropyl 4-methylbenzenesulfonate 12.

$^1\text{H}$  NMR (500 MHz,  $\text{CDCl}_3$ )  $\delta$  7.76 (d,  $J = 8.3$  Hz, 2H), 7.34 (d,  $J = 8.2$  Hz, 2H), 3.70 (t,  $J = 7.1$  Hz, 2H), 2.45 (s, 3H), 2.23 (t,  $J = 7.1$  Hz, 2H), 1.12 (app. t,  $J = 7.1$  Hz, 2H), 0.72 (app. t,  $J = 7.2$  Hz, 2H).

$^{13}\text{C}$  NMR (125 MHz,  $\text{CDCl}_3$ )  $\delta$  145.10 (e), 134.98 (e), 130.04 (o), 127.67 (o), 64.54 (e), 40.78 (e), 39.22 (e), 21.80 (o), 11.59 (e).

IR (Neat) 2970 (w), 1598 (w), 1452 (w), 1359 (s), 1347 (s), 1172 (vs), 1094 (s), 896 (vs), 813 (vs), 690 (s)  $\text{cm}^{-1}$ .

HRMS (ESI,  $[\text{M}+\text{H}]^+$ ) calculated for  $\text{C}_{12}\text{H}_{16}^{35}\text{ClO}_3\text{S}$  275.0503, found 275.0498.

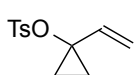

### 1-Vinylcyclopropyl 4-methylbenzenesulfonate 1.<sup>2</sup>

$^1\text{H}$  NMR (500 MHz,  $\text{CDCl}_3$ )  $\delta$  7.78 (d,  $J = 8.3$  Hz, 2H), 7.32 (d,  $J = 8.2$  Hz, 2H), 5.89

<sup>1</sup> O. G. Kulinkovich, Y. Y. Kozyrkov, A. V. Bekish, E. A. Matiushenkov and I. L. Lysenko, *Synthesis*, 2005, **10**, 1713.

<sup>2</sup> A. Stolle, J. Ollivier, P. P. Piras, J. Salaün and A. de Meijere, *J. Am. Chem. Soc.*, 1992, **114**, 4051

(dd,  $J = 17.2, 10.8$  Hz, 1H), 5.10 (d,  $J = 17.2$  Hz, 1H), 5.01 (d,  $J = 11.1$  Hz, 1H), 2.45 (s, 3H), 1.36 (d, A of AB,  $J_{AB} = 6.3$  Hz, 1H), 1.35 (d, B of AB,  $J_{AB} = 6.1$  Hz, 1H), 0.92 (dd, A of ABM,  $J_{AB} = 5.6$  Hz,  $J_{AM} = 1.0$  Hz, 1H), 0.91 (dd, B of ABM,  $J_{AB} = 6.0$  Hz,  $J_{BM} = 0.8$  Hz, 1H).

$^{13}\text{C}$  NMR (125 MHz,  $\text{CDCl}_3$ )  $\delta$  144.84 (e), 136.62 (o), 135.01 (e), 129.83 (o), 127.94 (o), 113.52 (e), 65.47 (e), 21.73 (o), 14.04 (e).

IR (Neat) 3003 (w), 1644 (w), 1596 (m), 1349 (vs), 1294 (m), 1165 (vs), 1089 (s), 1032 (s), 949 (vs), 906 (vs), 819 (vs)  $\text{cm}^{-1}$ .

HRMS (ESI,  $[\text{M}+\text{H}]^+$ ) calculated for  $\text{C}_{12}\text{H}_{15}\text{O}_3\text{S}$  239.0736, found 239.0729.

**3. Procedure for the Synthesis ACP 2a.**<sup>3</sup> Sodium hydride (0.46 g, 11.6 mmol; 60% in mineral oil) was suspended in anhydrous *N,N*-dimethylformamide (25 mL) and stirred at room temperature under an atmosphere of argon. *N*-allyl-4-methylbenzenesulfonamide (2.45 g, 11.6 mmol) was added and the reaction mixture was stirred for *ca.* 1 hour. Tris(dibenzylideneacetone)dipalladium (0.082 g, 0.09 mmol), 1,2-bis(diphenylphosphino)ethane (0.071 g, 0.18 mmol) and 1-vinylcyclopropyl 4-methylbenzenesulfonate **1** (2.0 g, 8.9 mmol) were dissolved in anhydrous tetrahydrofuran (25 mL) and stirred at room temperature for *ca.* 30 minutes before being added *via* Teflon<sup>®</sup> cannula to the solution of the anion. The resulting mixture was stirred for *ca.* 12 hours (t.l.c. control), diluted with deionized water (30 mL) and partitioned with diethyl ether (3 x 40 mL). The combined organic phases were washed with water (3 x 30 mL), saturated aqueous NaCl solution (30 mL), dried (anhyd.  $\text{MgSO}_4$ ), filtered and concentrated *in vacuo* to afford the crude product. Purification by flash chromatography ( $\text{SiO}_2$ , eluting with 10-20% diethyl ether/petroleum ether) afforded the alkylidenecyclopropane **2a** (2.19 g, 7.2 mmol, 89%).

#### 4. Spectral Data for ACP 2a

##### *N*-Allyl-*N*-(2-cyclopropylidenethyl)-4-methylbenzenesulfonamide **2a**.

$^1\text{H}$  NMR (500 MHz,  $\text{CDCl}_3$ )  $\delta$  7.70 (d,  $J = 8.3$  Hz, 2H), 7.29 (d,  $J = 8.3$  Hz, 2H), 5.64 (ddt,  $J = 16.8, 10.5, 6.3$  Hz, 1H), 5.60-5.58 (m, 1H), 5.12-5.06 (m, 2H), 3.94 (d,  $J = 6.8$  Hz, 2H), 3.78 (d,  $J = 6.3$  Hz, 2H), 2.43 (s, 3H), 1.07-1.02 (m, 2H), 1.00-0.95 (m, 2H).

$^{13}\text{C}$  NMR (125 MHz,  $\text{CDCl}_3$ )  $\delta$  143.21 (e), 137.67 (e), 133.16 (o), 129.75 (o), 127.39 (e), 127.27 (o), 118.50 (e), 112.76 (o), 49.51 (e), 48.30 (e), 21.67 (o), 2.59 (e), 2.04 (e).

IR (Neat) 3053 (w), 2982 (w), 2924 (m), 2856 (w), 1598 (m), 1495 (w), 1444 (m), 1339 (s), 1156 (vs), 1091 (s), 929 (s), 900 (s), 718 (s)  $\text{cm}^{-1}$ .

HRMS (CI,  $[\text{M}+\text{H}]^+$ ) calculated for  $\text{C}_{15}\text{H}_{20}\text{NO}_2\text{S}$  278.1215, found 278.1221.

<sup>3</sup> P. A. Evans and P. A. Inglesby, *J. Am. Chem. Soc.*, 2008, **130**, 12838.

## 5. Copies of NMR Spectra

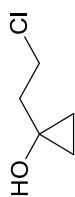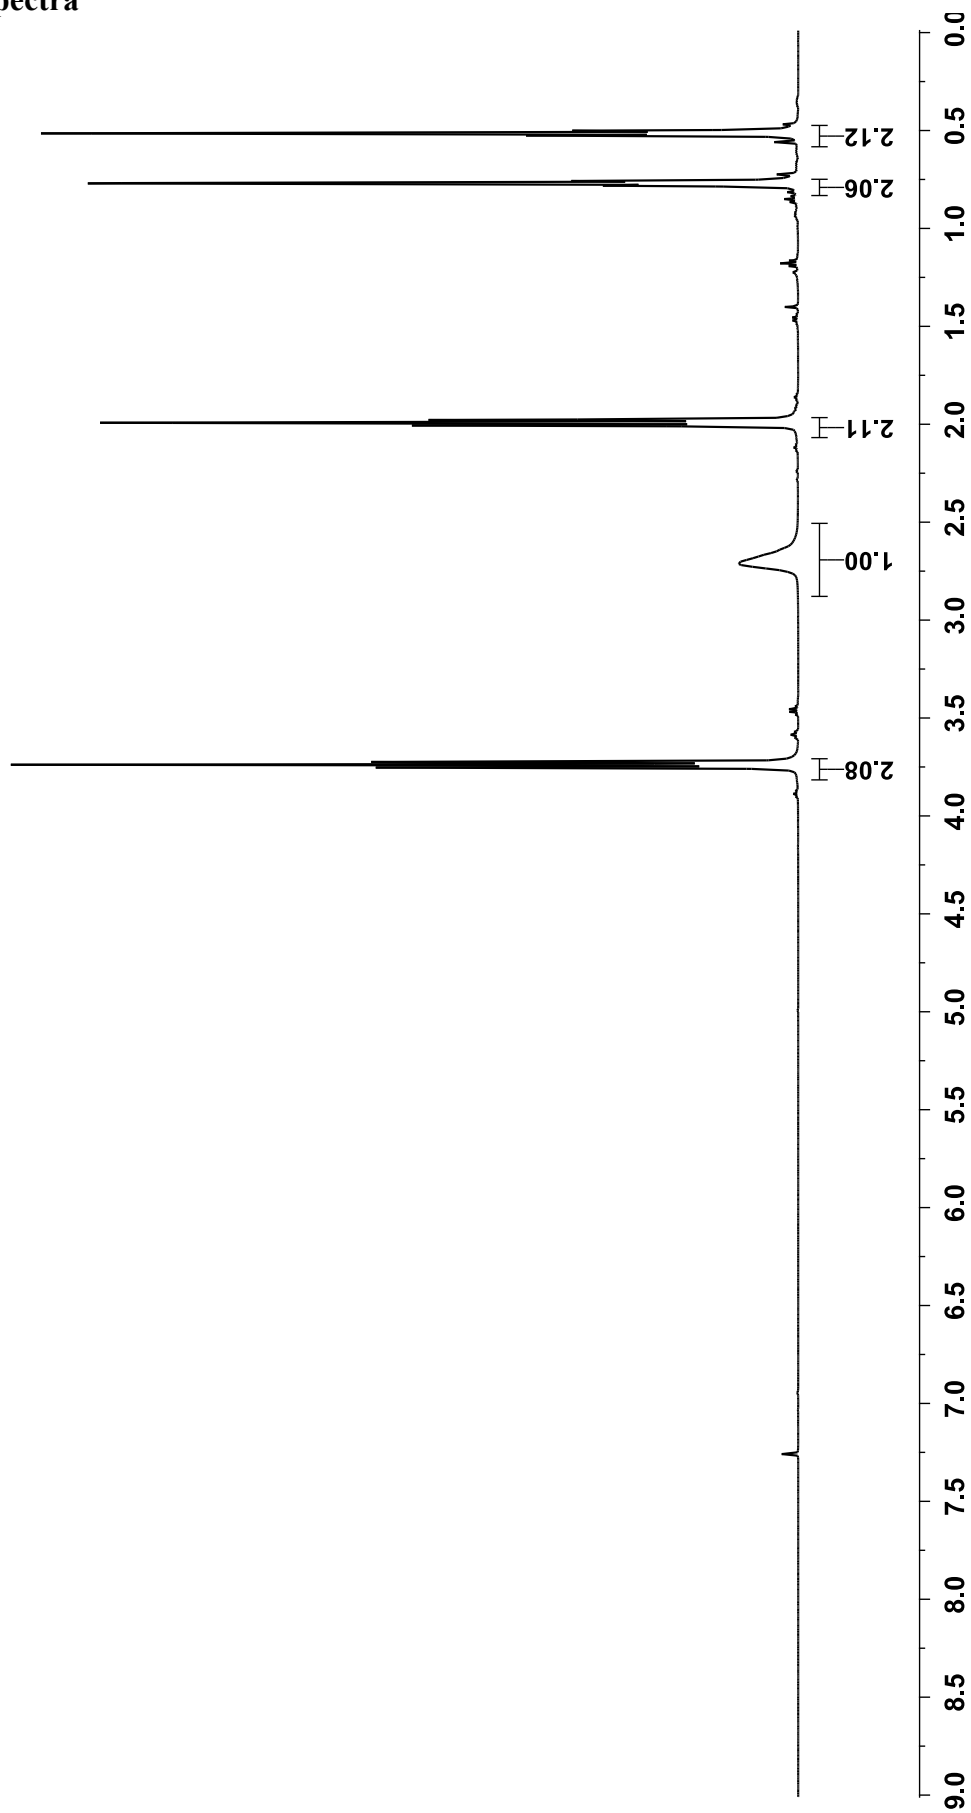

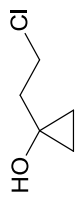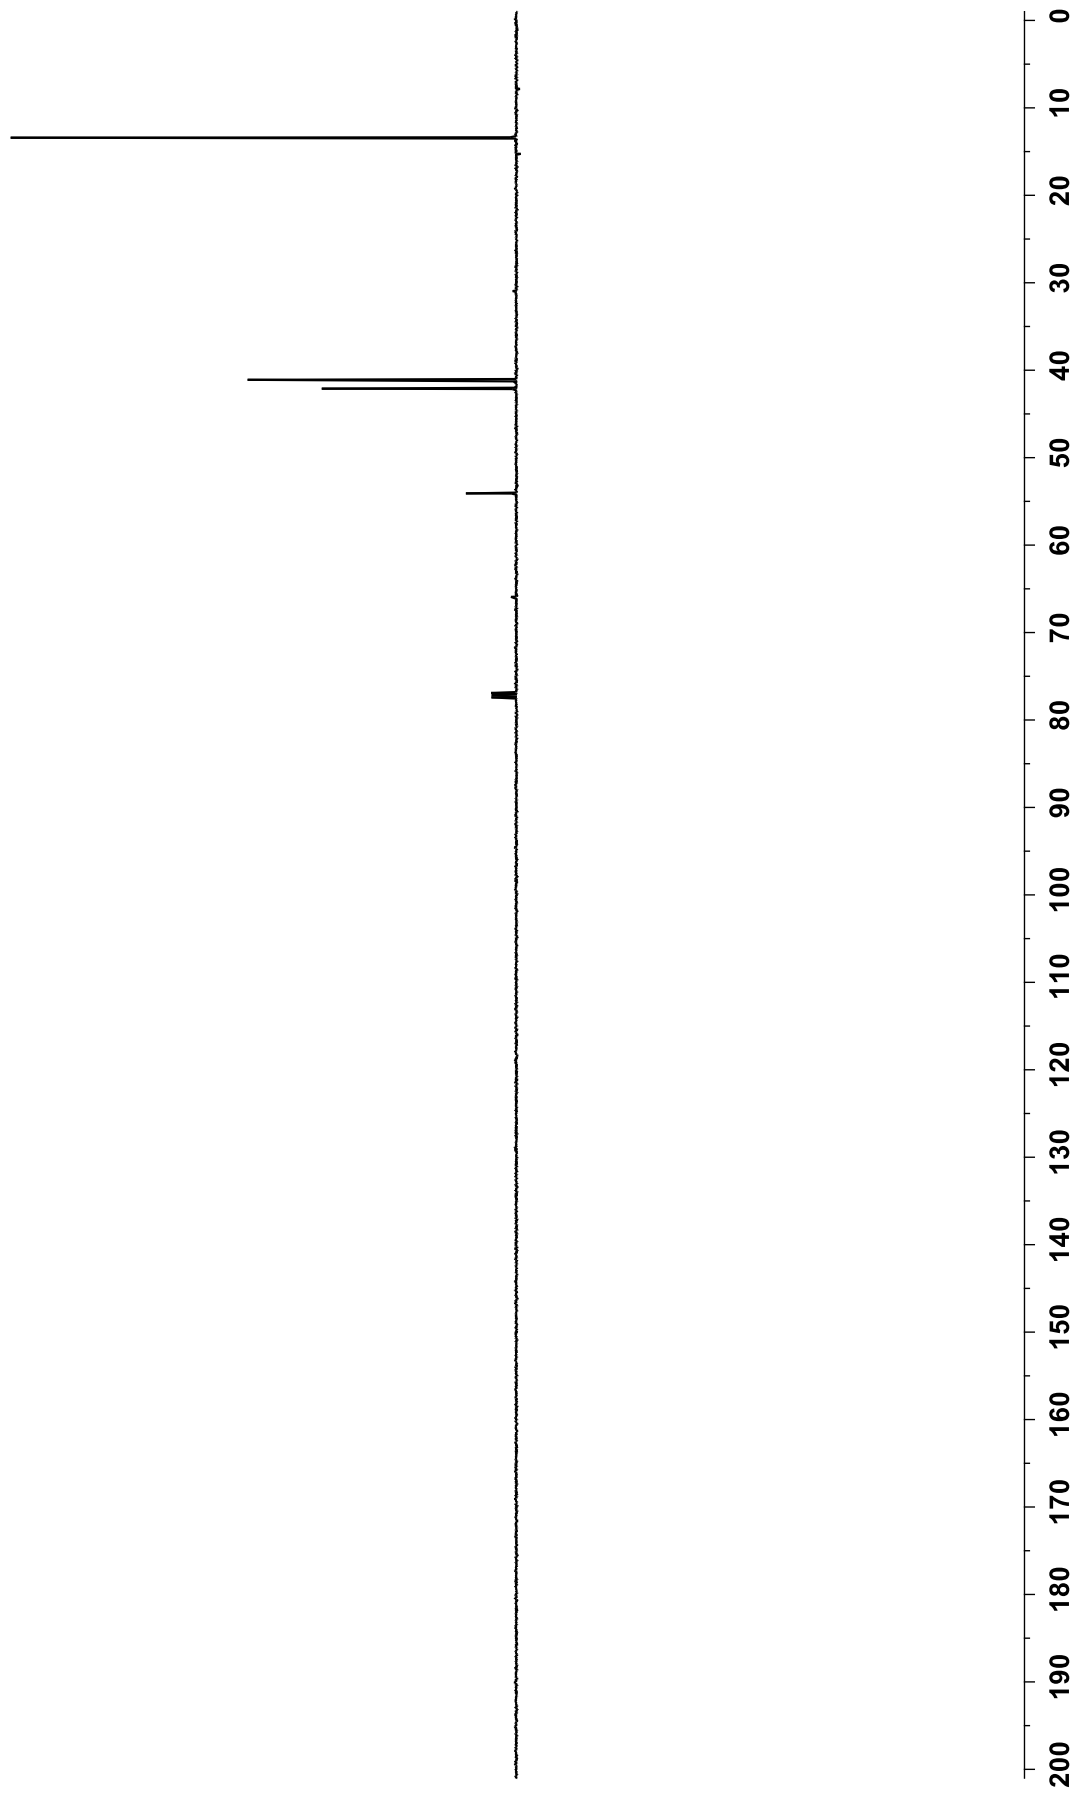

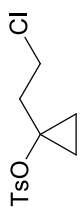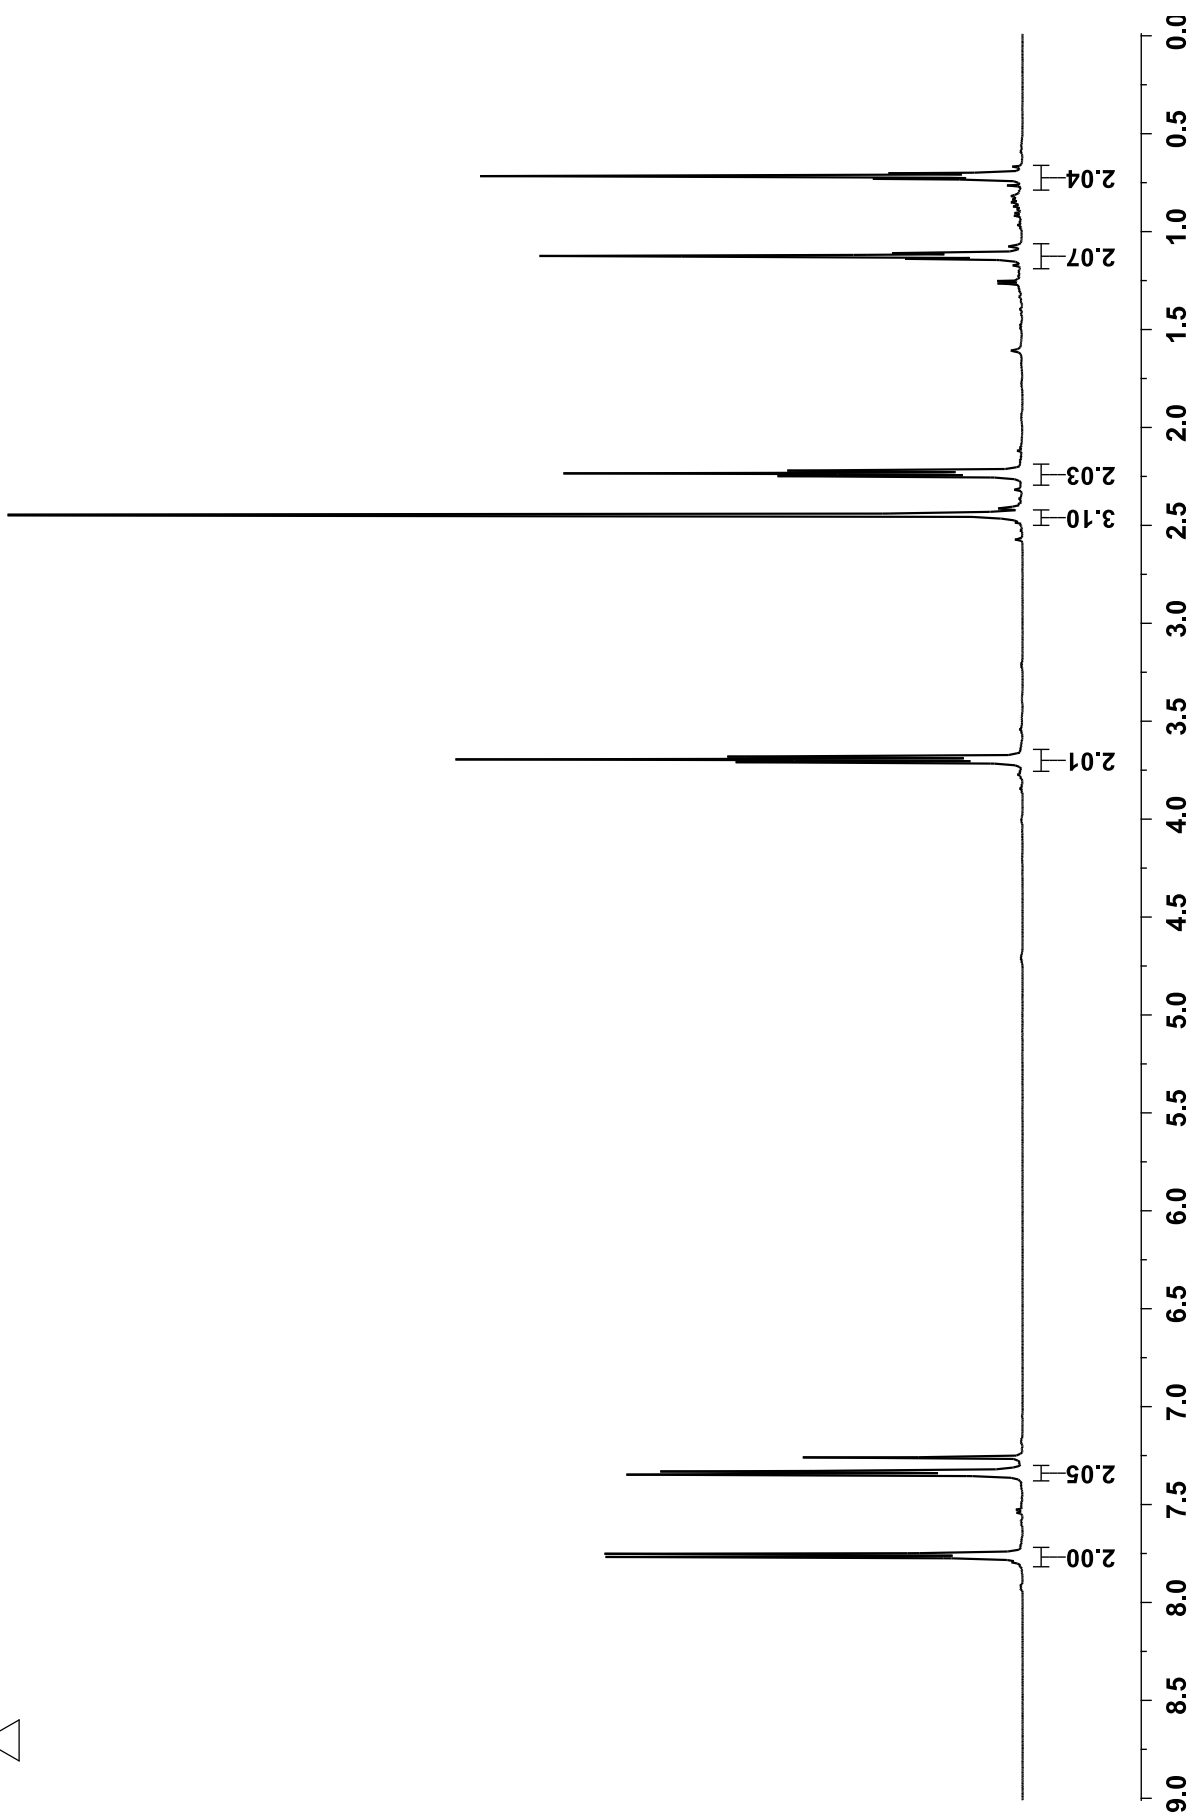

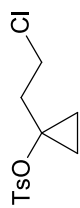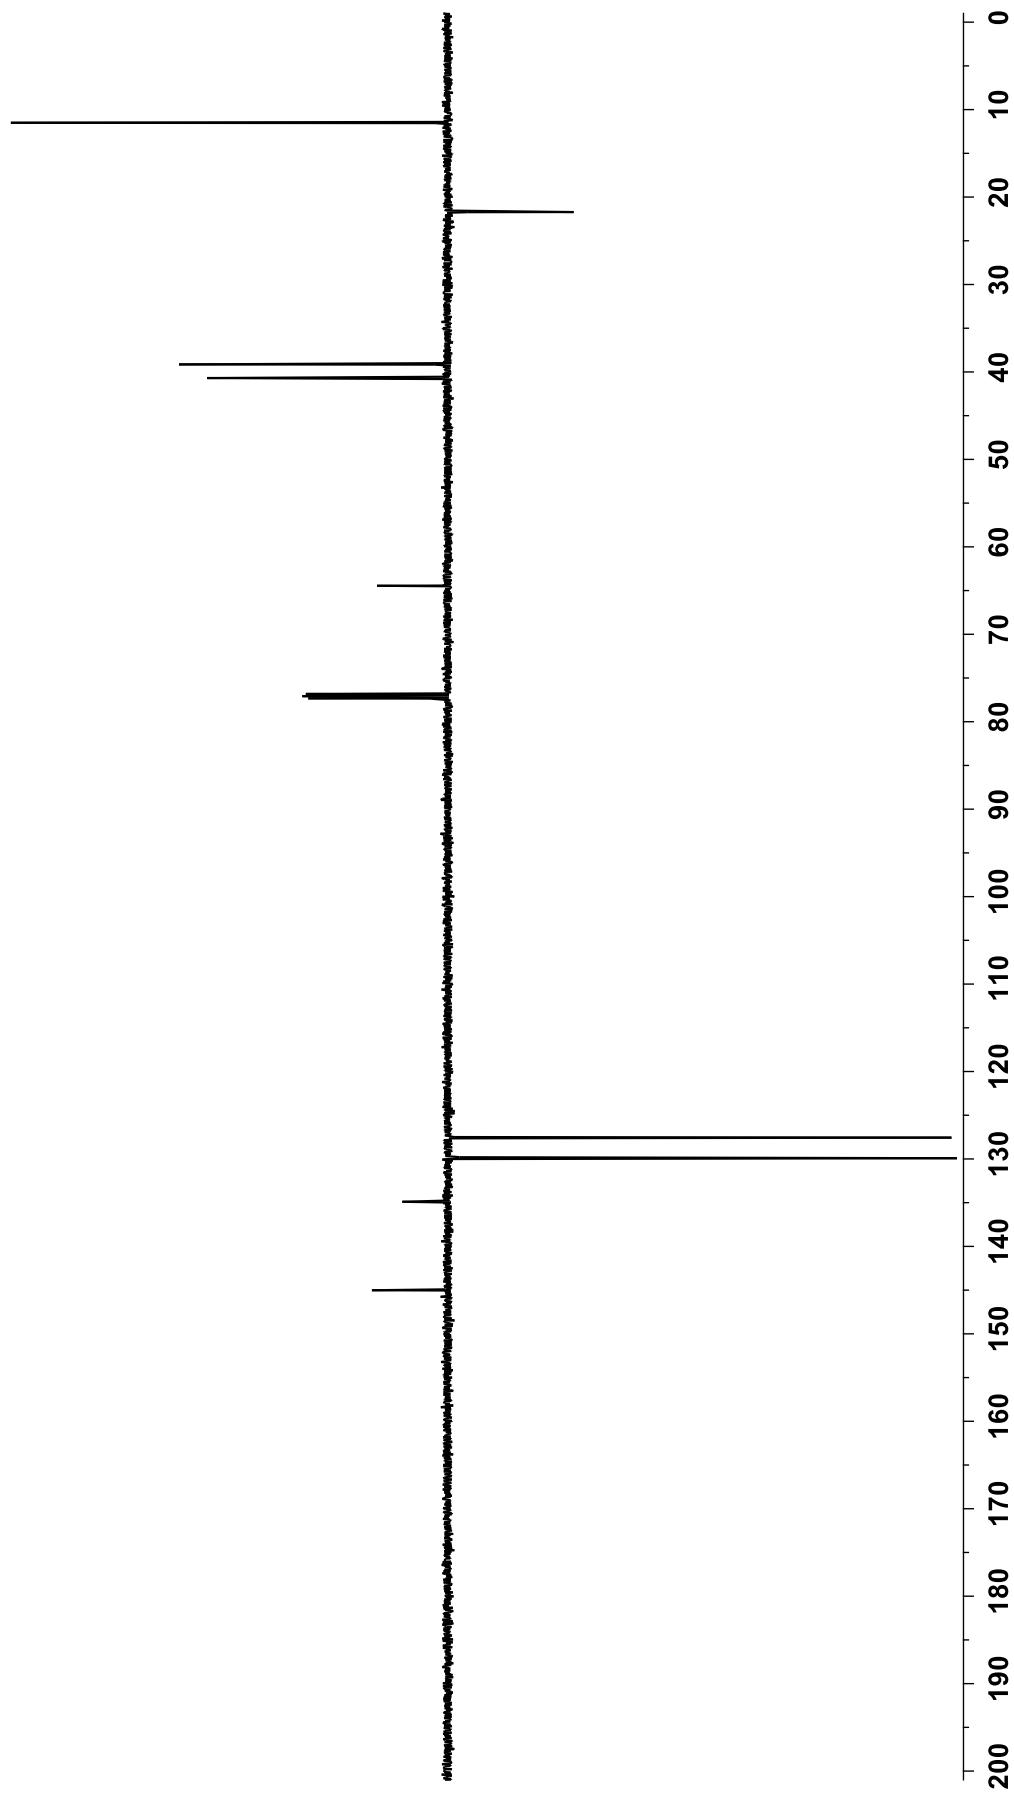

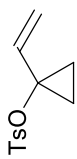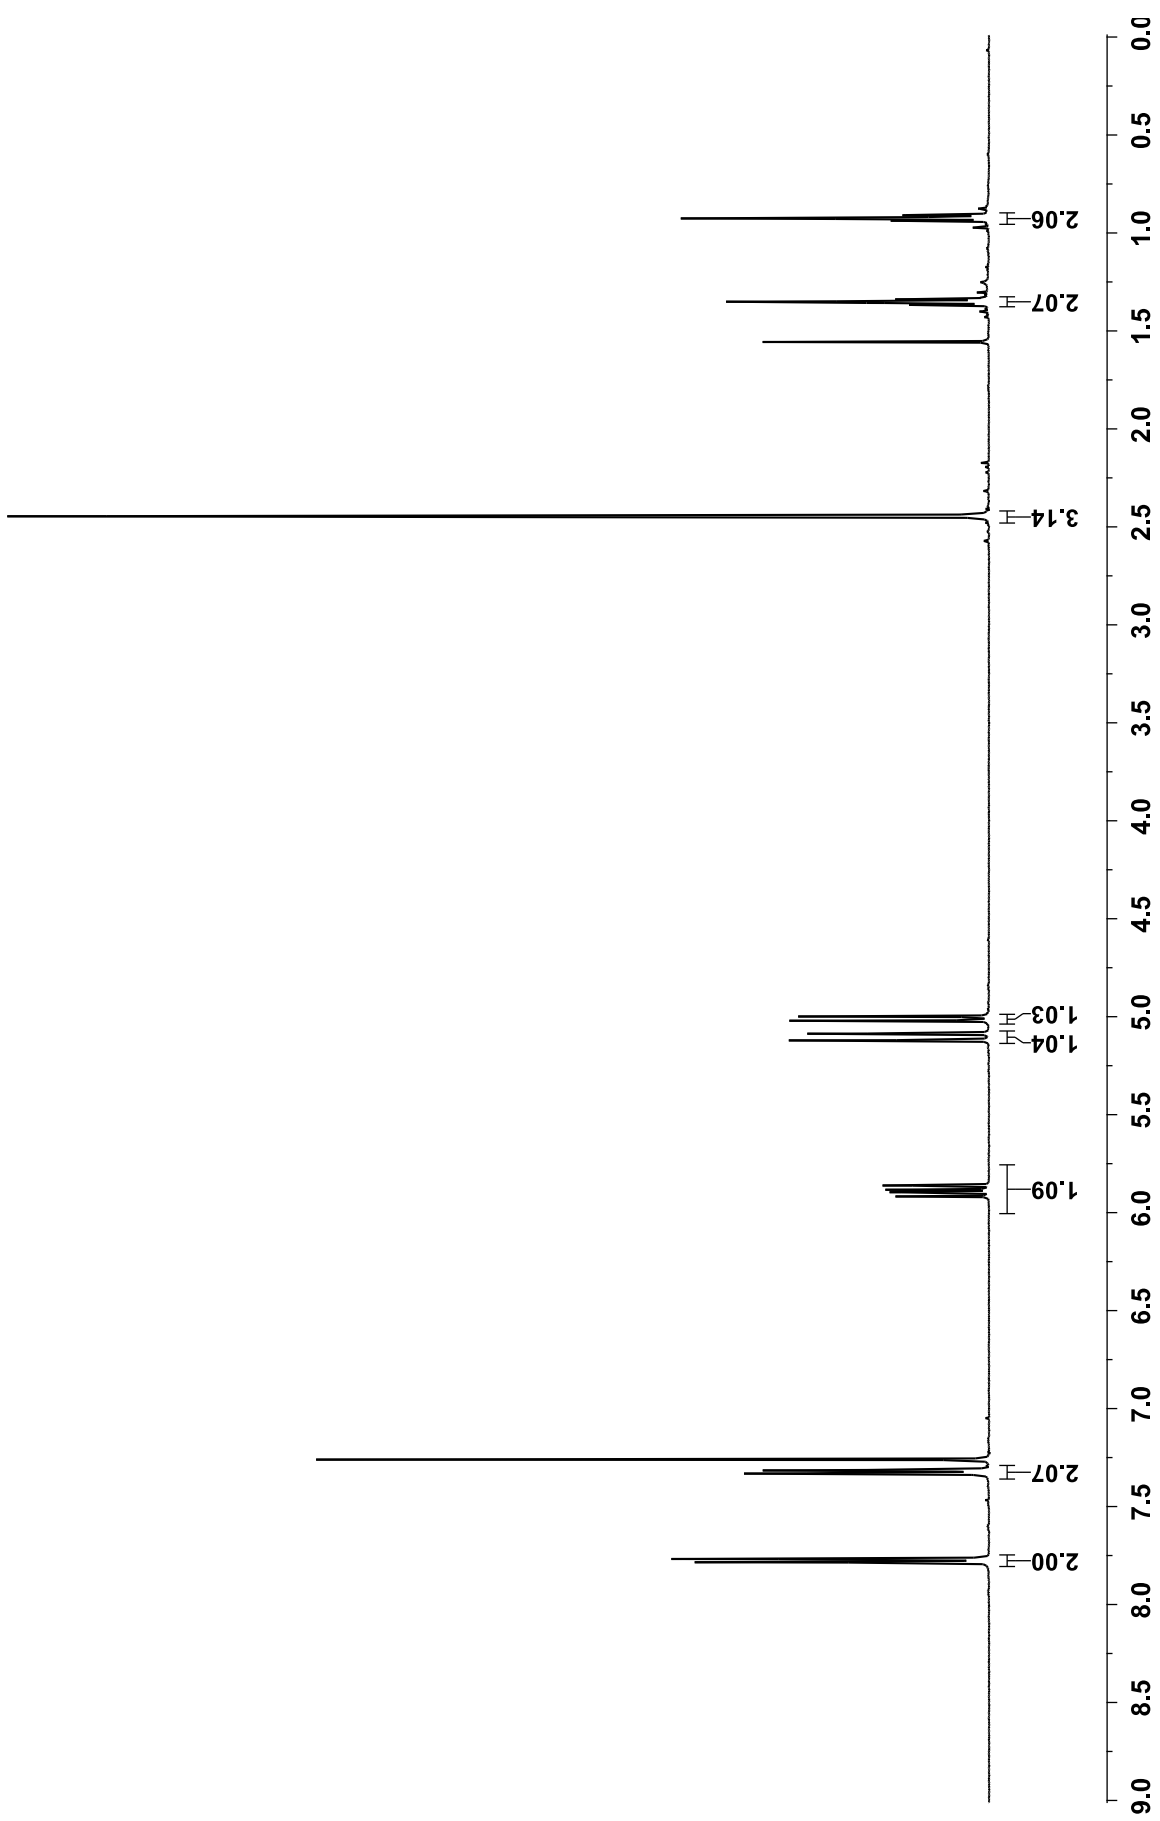



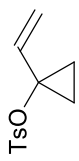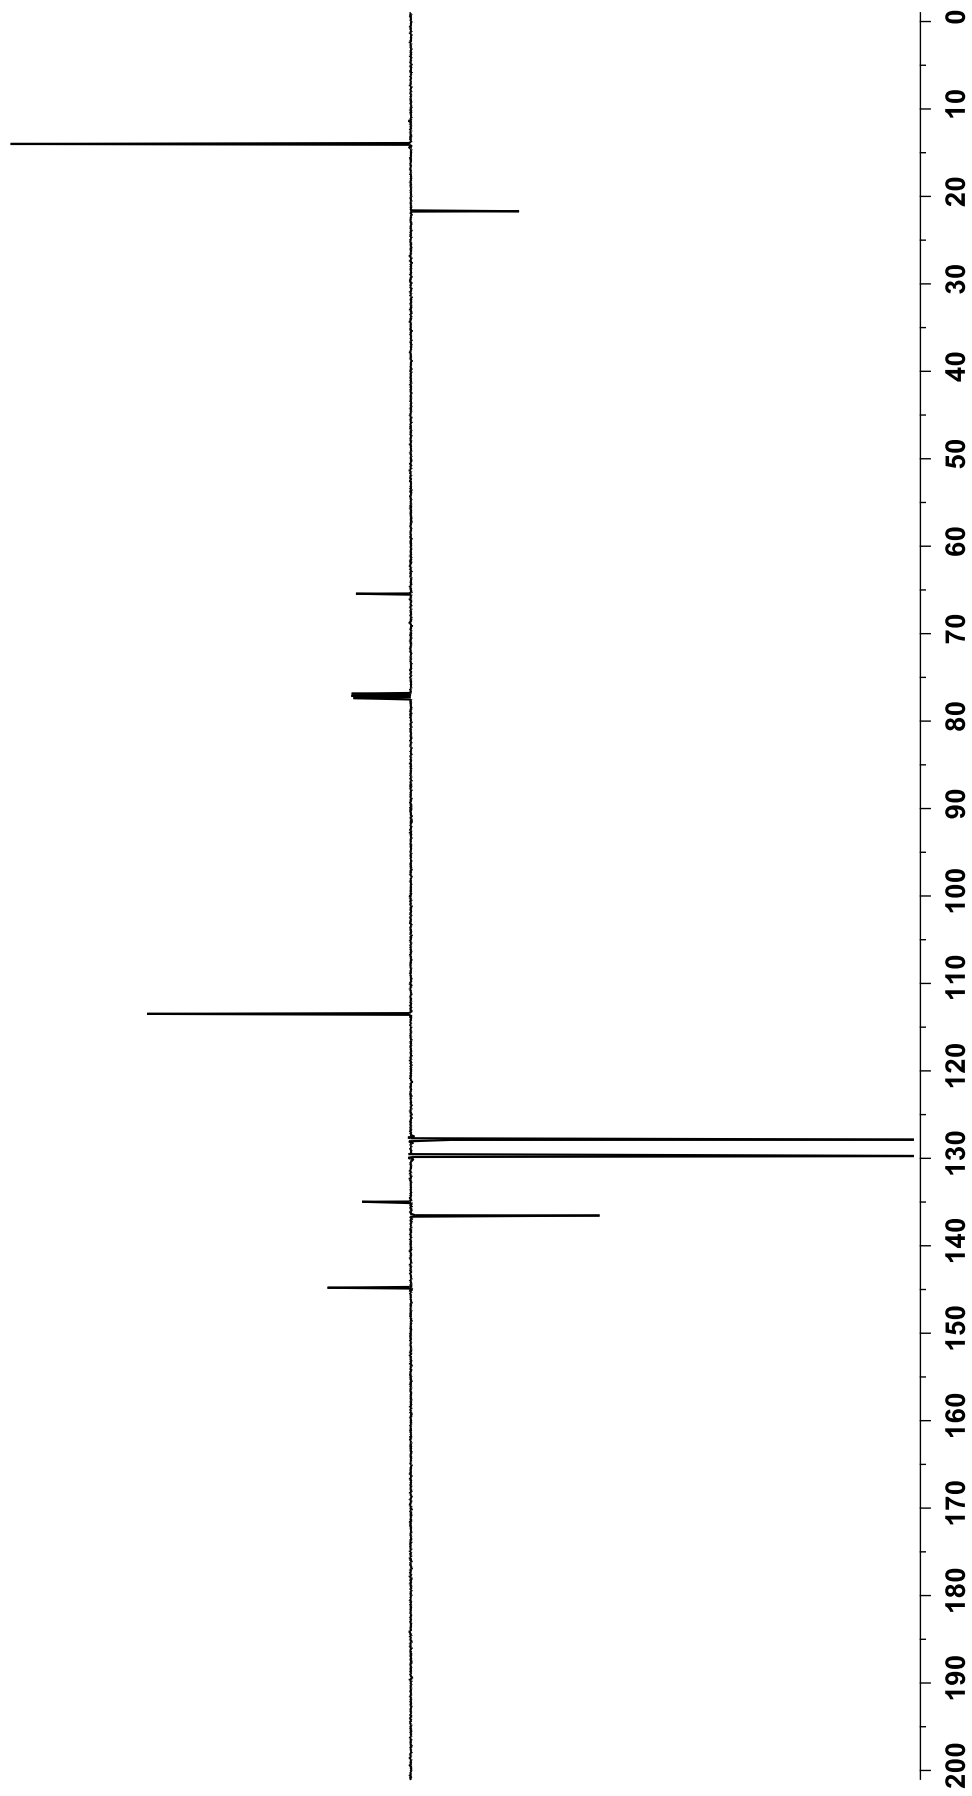

Supplement: c4qo00089g1.pdf [file c4qo00089g1.pdf]
